# Supplementary material for: Speciation with gene flow: Evidence from a complex of alpine butterflies (Coenonympha, Satyridae)
Source: PubMed Central journal article supplement (PMC6580291; doi:10.1002/ece3.5220), 2019-05-03
Supplement: ECE3-9-6444-s001.pdf [file ECE3-9-6444-s001.pdf]

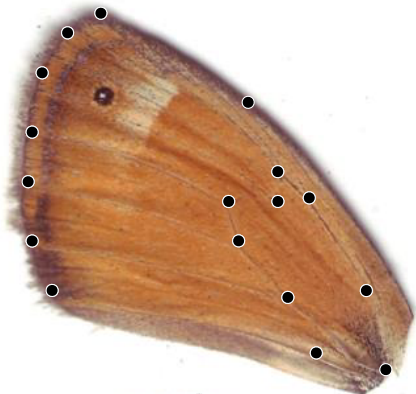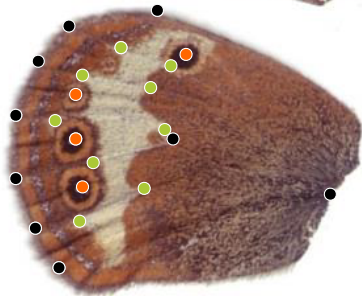

- White-band shape
- Eyespots alignment
- Venation
