# Supplementary material for: Speciation with gene flow: Evidence from a complex of alpine butterflies (Coenonympha, Satyridae)
Source: PubMed Central journal article supplement (PMC6580291; doi:10.1002/ece3.5220), 2019-05-03

**C. gardetta**

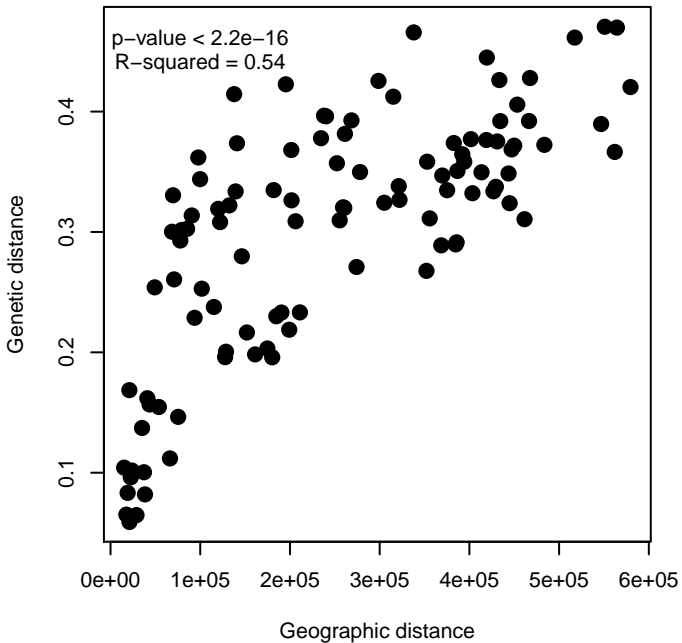

**C. darwiniana**

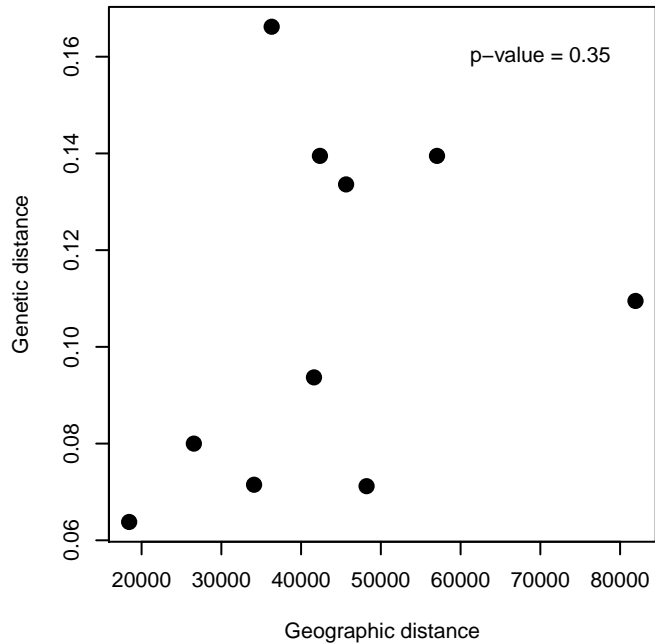

**C. macromma**

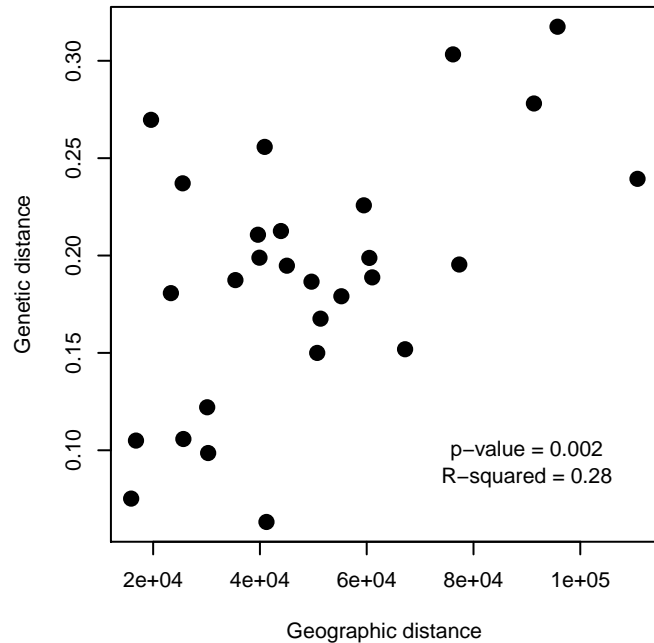

Supplement: ECE3-9-6444-s002.pdf [file ECE3-9-6444-s002.pdf]
